# Supplementary material
Source: MDPI journal article supplement (https://www.mdpi.com/2304-6740/10/9/127)
Supplement: s1 [file s1]

# Effect of the Synthesis Conditions on the Morphology, Luminescence and Scintillation Properties of a New Light Scintillation Material $\text{Li}_2\text{CaSiO}_4\text{:Eu}^{2+}$ for Neutrons and Charged Particles Detection

Ilia Komendo <sup>1,2,\*</sup>, Vitaly Mechinsky <sup>2</sup>, Andrei Fedorov <sup>2</sup>, Georgy Dosovitskiy <sup>1</sup>, Victor Schukin <sup>1</sup>, Daria Kuznetsova <sup>1,2</sup>, Marina Zyкова <sup>3</sup>, Yury Velikodny <sup>4</sup> and Mikhail Korjik <sup>1,2</sup>

<sup>1</sup> NRC “Kurchatov Institute” — IREA, Bogorodskiy val 3, 107076 Moscow, Russia

<sup>2</sup> NRC “Kurchatov Institute”, Kurchatov Square 1, 123182 Moscow, Russia

<sup>3</sup> Department of Chemistry and Technology of Crystals, Moscow University of Chemical Technology of Russia, Miusskaya 9, 125047 Moscow, Russia

<sup>4</sup> Department of Chemistry, Moscow State University, Kolmogorova 1-3, 119991 Moscow, Russia

\* Correspondence: ilia.komendo@cern.ch; Tel.: +7-9168312556

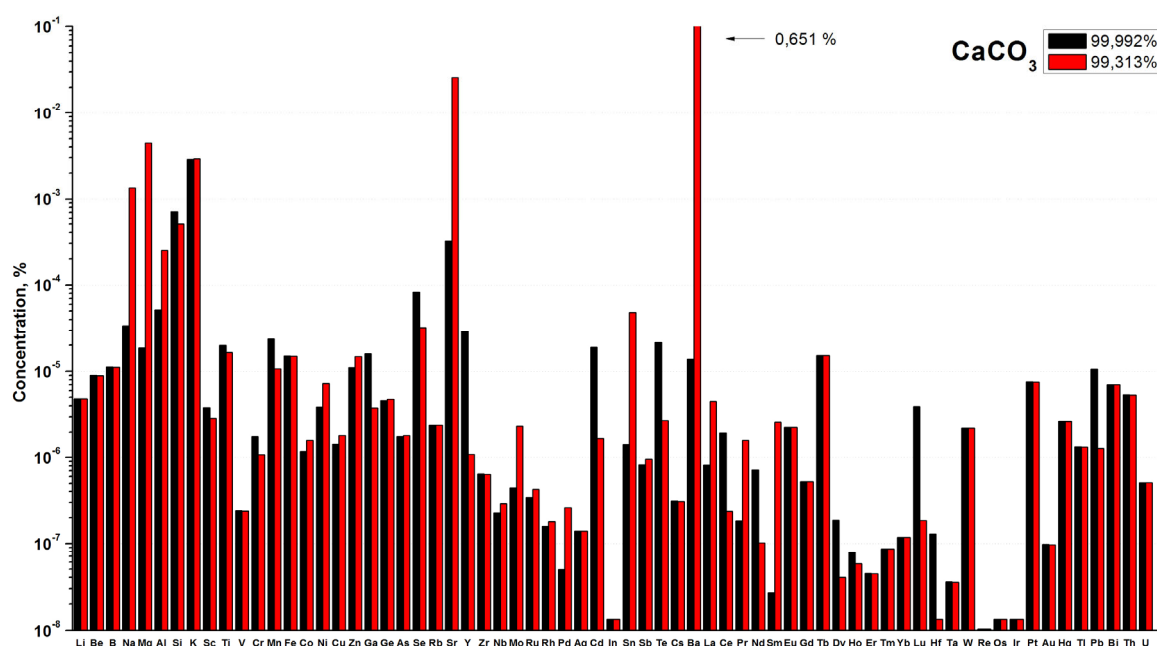

Figure S1. Impurity content in reagent grade  $\text{CaCO}_3$  (red columns) and purified (black columns)

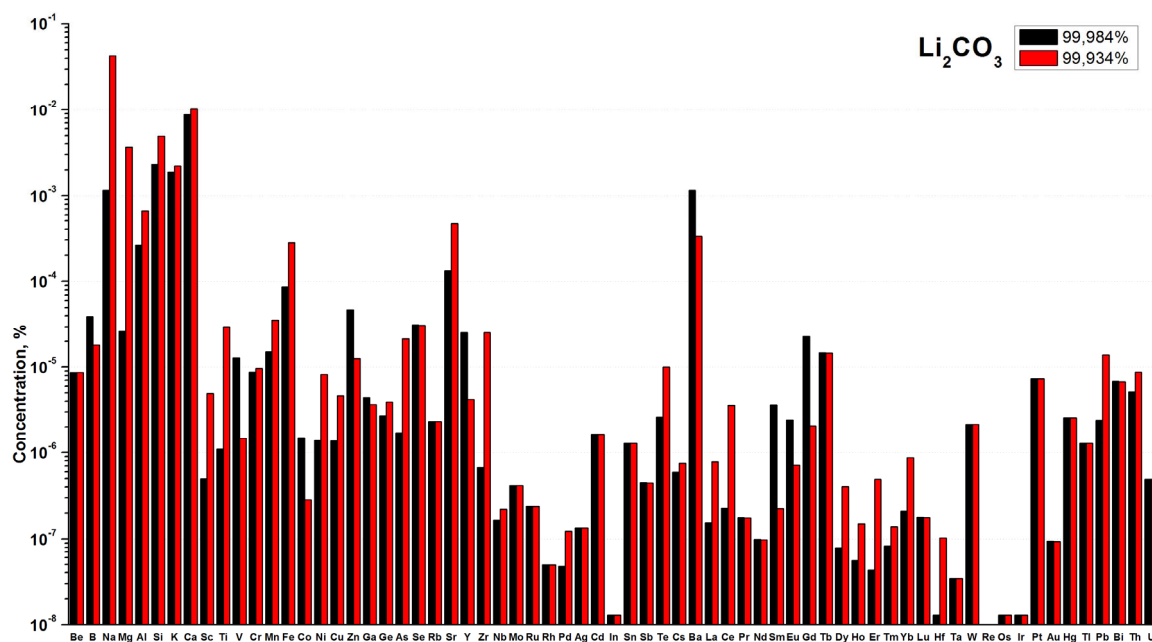

**Figure S2.** Impurity content in reagent grade  $\text{Li}_2\text{CO}_3$  (red columns) and purified (black columns)
